# Supplementary material
Source: PubMed Central journal article supplement (PMC7473093)
Supplement: LID-2019-S1473-3099(19)30393-7-s1.pdf [file LID-2019-S1473-3099%2819%2930393-7-s1.pdf]

# THE LANCET Infectious Diseases

## Supplementary webappendix

This webappendix formed part of the original submission and has been peer reviewed. We post it as supplied by the authors.

Supplement to: Bernstein DI, Guptill J, Naficy A, et al. Immunogenicity of chimeric haemagglutinin-based, universal influenza virus vaccine candidates: interim results of a randomised, placebo-controlled, phase 1 clinical trial. *Lancet Infect Dis* 2019; published online Oct 17. [https://doi.org/10.1016/S1473-3099\(19\)30393-7](https://doi.org/10.1016/S1473-3099(19)30393-7).

**Suppl. Table 1. Categorical Demographics and Baseline Characteristics - All Enrolled Subjects**

|                      |                                           | CCHMC<br>(N=26) |       | DCRI <sup>a</sup><br>(N=39) |       | All Subjects<br>(N=65) |       |
|----------------------|-------------------------------------------|-----------------|-------|-----------------------------|-------|------------------------|-------|
| Demographic Category | Characteristic                            | n               | %     | n                           | %     | n                      | %     |
| Gender               | Female                                    | 18              | 69.2% | 22                          | 56.4% | 40                     | 61.5% |
|                      | Male                                      | 8               | 30.8% | 17                          | 43.6% | 25                     | 38.5% |
| Ethnicity            | Hispanic or Latino                        | 1               | 3.8%  | 2                           | 5.1%  | 3                      | 4.6%  |
|                      | Not Hispanic or Latino                    | 25              | 96.2% | 37                          | 94.9% | 62                     | 95.4% |
|                      | Not Reported                              | 0               | 0%    | 0                           | 0%    | 0                      | 0%    |
|                      | Unknown                                   | 0               | 0%    | 0                           | 0%    | 0                      | 0%    |
| Race                 | American Indian/ Alaskan Native           | 0               | 0%    | 0                           | 0%    | 0                      | 0%    |
|                      | Asian                                     | 0               | 0%    | 1                           | 2.6%  | 1                      | 1.5%  |
|                      | Native Hawaiian or Other Pacific Islander | 0               | 0%    | 0                           | 0%    | 0                      | 0%    |
|                      | Black or African American                 | 23              | 88.5% | 26                          | 66.7% | 49                     | 75.4% |
|                      | White                                     | 2               | 7.7%  | 11                          | 28.2% | 13                     | 20.0% |
|                      | Multi-Racial                              | 1               | 3.8%  | 0                           | 0%    | 1                      | 1.5%  |
|                      | Unknown                                   | 0               | 0%    | 1                           | 2.6%  | 1                      | 1.5%  |

Note: N = number of enrolled subjects.

<sup>a</sup> Excludes one subject who was randomized but replaced prior to receiving study treatment

CCHMC=

DCRI=

**Suppl. Table 2. Continuous Demographics and Baseline Characteristics - All Enrolled Subjects**

|             |                    | <b>CCHMC (N=26)</b> | <b>DCRI<sup>a</sup> (N=39)</b> | <b>Subjects (N=65)</b> |
|-------------|--------------------|---------------------|--------------------------------|------------------------|
| Age (years) | Mean               | 27.6                | 30.0                           | 29.0                   |
|             | Standard Deviation | 5.5                 | 5.2                            | 5.4                    |
|             | Median             | 27.0                | 31.0                           | 29.0                   |
|             | Minimum            | 19                  | 18                             | 18                     |
|             | Maximum            | 38                  | 37                             | 38                     |
| Height (cm) | Mean               | 170.1               | 169.6                          | 169.8                  |
|             | Standard Deviation | 10.2                | 9.4                            | 9.6                    |
|             | Median             | 168.8               | 168.0                          | 168.5                  |
|             | Minimum            | 155                 | 155                            | 155                    |
|             | Maximum            | 195                 | 188                            | 195                    |
| Weight (kg) | Mean               | 79.2                | 80.5                           | 80.0                   |
|             | Standard Deviation | 17.2                | 16.2                           | 16.5                   |
|             | Median             | 78.9                | 81.6                           | 81.1                   |
|             | Minimum            | 51                  | 47                             | 47                     |
|             | Maximum            | 120                 | 118                            | 120                    |

Note: N = number of enrolled subjects.

<sup>a</sup> Excludes one subject who was randomized but replaced prior to receiving study treatment.

CCHMC=

DCRI=
